# Supplementary material
Source: publisher figshare collection journal article supplement (https://aacr.figshare.com/articles/dataset/_/22455998)

**Figure S3. Concentrations of constitutive products in the serum from animals given irinotecan or IMM U-132 in nude mice bearing Capan-1 from 2 separate studies.** In Study 2, tumors were ~2-fold larger than Study 1. (A) Irinotecan-treated animals; (B) IMM U-132-treated, acid-hydrolyzed samples to quantify SN-38 [TOTAL], (C) non-hydrolyzed samples to quantify free SN-38 or SN-38G.

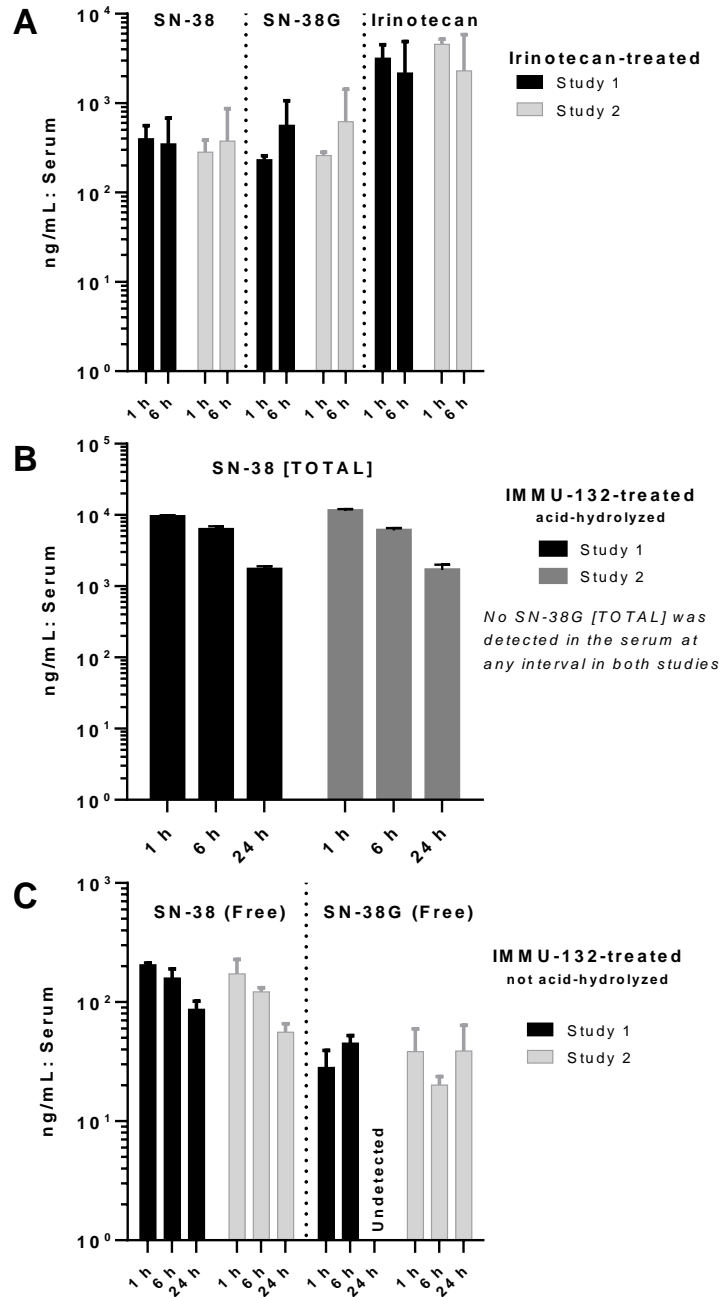

Supplement: Supplementary file 1 [file 39907154]
